# Supplementary material
Source: Springer Nature journal article supplement (https://www.springermedizin.de/resource/supplementary/12889_2011_4282_MOESM1_ESM.pdf/9491758)
Supplement: MOESM1 [file 9491758]

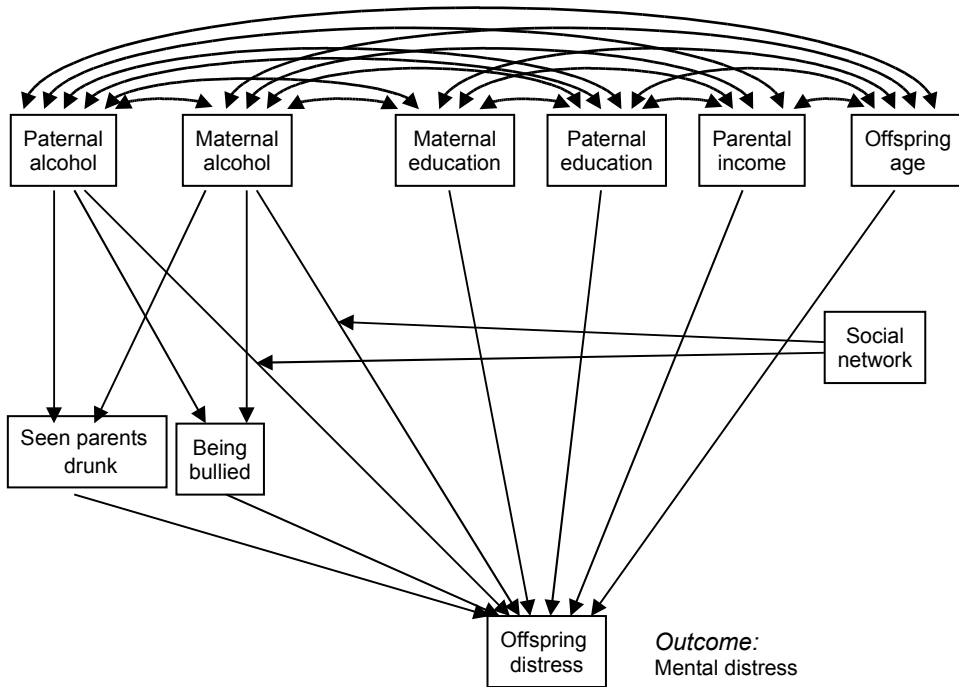

***Predictors and confounders:***

Parental alcohol, education, income, offsprings' sex, age, personality, siblings

***Moderators:***

All predictors and mediators

***Mediators:***

Parental mental health, divorce offsprings' social network, various school problems, self esteem, having seen parents drunk

***Outcome:***  
Mental distress
